# Supplementary material for: Association of DNA Promoter Methylation and BRAF Mutation in Thyroid Cancer
Source: Curr Oncol. 2023 Mar 2;30(3):2978–96. doi: 10.3390/curroncol30030227 (PMC10047424; doi:10.3390/curroncol30030227)
Supplement: Supplementary file 1 [file curroncol-30-00227-s001.zip]

Archive with 12 entries (12 files):
- Figure_S1.pdf
- Table_S10_List DNA damage genes.csv
- Table_S11_List_T-cell inflamed Genes.csv
- Table_S1_Cross-tabulations_RegFeature_RelationIsland.xlsx
- Table_S2_BRAF mut-specific 35 DML.csv
- Table_S3_Enrichment Score_Common 51 DML.csv
- Table_S4_Enrichment Score_BRAF mut-specific 35 DML.csv
- Table_S5_Enrichment Score_BRAF wild-specific 62 DML.csv
- Table_S6_DML in thyroid cancer  earlier studies.xlsx
- Table_S7_Diffenrential methylation of previously reported genes_BRAF mutant.csv
- Table_S8_Diffenrential methylation of previously reported genes_BRAF wild.csv
- Table_S9_List_Cancer Related Genes.csv
