# Supplementary material for: Association of DNA Promoter Methylation and BRAF Mutation in Thyroid Cancer
Source: Curr Oncol. 2023 Mar 2;30(3):2978–96. doi: 10.3390/curroncol30030227 (PMC10047424; doi:10.3390/curroncol30030227)
Supplement: Supplementary file 1 [file curroncol-30-00227-s001.zip › Table_S1_Cross-tabulations_RegFeature_RelationIsland.xlsx]

## Sheet: Table S1
REGULATORY_FEATURE_GROUP \ RELATION_TO_UCSC_CPG_ISLAND	Deep Sea	Island	N_Shelf	N_Shore	S_Shelf	S_Shore	Total
Not known	148377	57365	20568	36183	18566	27028	308087
Gene_Associated	568	212	129	172	85	112	1278
Gene_Associated_Cell_type_specific	820	287	184	298	137	223	1949
NonGene_Associated	127	770	8	202	15	202	1324
NonGene_Associated_Cell_type_specific	41	83	15	59	4	17	219
Promoter_Associated	5480	58586	422	12858	404	11918	89668
Promoter_Associated_Cell_type_specific	1038	2262	182	1217	167	724	5590
Unclassified	7290	13448	834	4389	752	3288	30001
Unclassified_Cell_type_specific	9238	12829	1881	5845	1601	4354	35748
Total	172979	145842	24223	61223	21731	47866	473864
