# Supplementary material for: Association of DNA Promoter Methylation and BRAF Mutation in Thyroid Cancer
Source: Curr Oncol. 2023 Mar 2;30(3):2978–96. doi: 10.3390/curroncol30030227 (PMC10047424; doi:10.3390/curroncol30030227)
Supplement: Supplementary file 1 [file curroncol-30-00227-s001.zip › Table_S2_BRAF mut-specific 35 DML.csv]

Probeset ID	Gene_Symbol	p-value(Tissue)	p-value(Sex)	p-value(PersonID(Sex))	Mean(Normal)	LSMean(Normal)	Mean(Tumor)	LSMean(Tumor)	p-value(Tumor vs. Normal)	Difference(Tumor vs. Normal)	Difference(Tumor vs. Normal) (Description)	F(Tissue)	SS(Tissue)	F(Sex)	SS(Sex)	F(PersonID(Sex))	SS(PersonID(Sex))	SS(Error)	F(Error)
cg26189983	TNFRSF1B	2.69E-05	0.295034	0.63965	0.498334	0.489457	0.292607	0.283731	2.69E-05	-0.205727	Tumor down vs Normal	32.3084	0.380912	1.17201	0.0115232	0.833936	0.157312	0.200428	1
cg22250781	NHLRC4	2.65E-06	0.0316802	0.720693	0.625652	0.612384	0.444318	0.431051	2.65E-06	-0.181333	Tumor down vs Normal	47.3819	0.295936	5.5416	0.0257439	0.743795	0.0743292	0.106178	1
cg00073090		6.69E-05	0.0750496	0.308463	0.539302	0.523576	0.385239	0.369513	6.69E-05	-0.154063	Tumor down vs Normal	27.4295	0.213619	3.62532	0.0361679	1.28102	0.159624	0.132395	1
cg03157040	KLF16	0.000101955	0.764796	0.580697	0.423189	0.421001	0.26947	0.267282	0.000101955	-0.153719	Tumor down vs Normal	25.3461	0.212665	0.0926189	0.000700039	0.900821	0.120932	0.142637	1
cg08905114	NINJ1	9.43E-10	0.958687	0.0282658	0.31915	0.318894	0.172683	0.172426	9.43E-10	-0.146467	Tumor down vs Normal	145.22	0.193073	0.00276873	9.65E-06	2.62285	0.0557943	0.022602	1
cg09326440	HLA-E	2.99E-07	0.206468	0.02793	0.508086	0.498703	0.364321	0.354938	2.99E-07	-0.143765	Tumor down vs Normal	65.8818	0.186016	1.73387	0.0128753	2.63001	0.118812	0.0479991	1
cg19643921	NUMBL	0.000103824	0.484306	0.339352	0.313454	0.308232	0.180069	0.174848	0.000103824	-0.133385	Tumor down vs Normal	25.2587	0.160123	0.512669	0.0039879	1.22706	0.124459	0.107769	1
cg25164886		6.72E-05	0.442774	0.216007	0.413277	0.407472	0.285251	0.279446	6.72E-05	-0.128025	Tumor down vs Normal	27.4061	0.147514	0.619396	0.0049286	1.47832	0.127314	0.091503	1
cg21176130	HLA-E	4.48E-05	0.226009	0.0421194	0.392637	0.381348	0.265602	0.254314	4.48E-05	-0.127034	Tumor down vs Normal	29.5064	0.14524	1.58566	0.0186365	2.38773	0.188051	0.0836793	1
cg02917867		8.59E-06	0.0698764	0.143086	0.509133	0.496518	0.383521	0.370906	8.59E-06	-0.125612	Tumor down vs Normal	39.2189	0.142006	3.77371	0.0232734	1.70325	0.0986758	0.0615547	1
cg01758899	TK2	7.64E-06	0.403904	0.18795	0.29882	0.302959	0.200115	0.204255	7.64E-06	-0.0987041	Tumor down vs Normal	39.9801	0.0876825	0.735072	0.00250592	1.55442	0.0545454	0.0372836	1
cg01148741	DUSP2	4.20E-06	0.648264	0.142902	0.573488	0.575586	0.480993	0.483091	4.20E-06	-0.0924953	Tumor down vs Normal	44.048	0.0769984	0.216137	0.000643786	1.70395	0.0476576	0.029717	1
cg23944925	LRRC33	0.000136117	0.93015	0.795953	0.279799	0.279478	0.192025	0.191703	0.000136117	-0.0877747	Tumor down vs Normal	23.9768	0.0693396	0.00792932	1.51E-05	0.65798	0.0304455	0.0491631	1
cg14686919	SLC17A9	0.000131305	0.398289	0.102699	0.339351	0.334633	0.260927	0.256209	0.000131305	-0.0784237	Tumor down vs Normal	24.1448	0.0553525	0.753222	0.00325501	1.88502	0.0691432	0.0389729	1
cg17150866	RREB1	1.96E-06	0.286613	0.109018	0.239432	0.243496	0.162456	0.166521	1.96E-06	-0.0769758	Tumor down vs Normal	49.6685	0.0533275	1.21519	0.00241654	1.85216	0.0318178	0.0182524	1
cg23124755	SUGT1P1	2.54E-05	0.854086	0.116306	0.265018	0.264248	0.194611	0.193841	2.54E-05	-0.0704077	Tumor down vs Normal	32.6437	0.0446152	0.0349326	8.67E-05	1.81663	0.0397255	0.0232345	1
cg10591064		1.49E-06	0.782367	0.0320067	0.219628	0.218707	0.160031	0.15911	1.49E-06	-0.0595972	Tumor down vs Normal	51.8279	0.0319665	0.0789198	0.000124065	2.54878	0.0251526	0.0104853	1
cg00927231		0.00011689	0.70347	0.0106377	0.166407	0.164411	0.109024	0.107027	0.00011689	-0.0573836	Tumor down vs Normal	24.6925	0.0296359	0.15018	0.000582959	3.23424	0.0621078	0.0204034	1
cg19965511	HCRT	0.000129477	0.497053	0.183618	0.283439	0.28101	0.228062	0.225633	0.000129477	-0.0553776	Tumor down vs Normal	24.2104	0.0276001	0.482961	0.000862843	1.56715	0.0285851	0.0193802	1
cg09753839	HLA-E	8.33E-05	0.595365	0.0102012	0.258368	0.255964	0.207551	0.205146	8.33E-05	-0.0508173	Tumor down vs Normal	26.3294	0.0232416	0.293639	0.000845444	3.26172	0.0460672	0.0150063	1
cg18335931	MAST3	4.79E-06	0.766575	0.229682	0.243764	0.243084	0.194164	0.193484	4.79E-06	-0.0496002	Tumor down vs Normal	43.1314	0.0221416	0.0911775	6.76E-05	1.44464	0.0118657	0.008727	1
cg15408734		5.49E-05	0.987377	0.304404	0.202658	0.20262	0.157173	0.157134	5.49E-05	-0.0454859	Tumor down vs Normal	28.4481	0.0186207	0.000258258	2.18E-07	1.28846	0.0134938	0.0111274	1
cg24804517	DIDO1	0.000124028	0.279994	0.208702	0.343372	0.346386	0.299489	0.302504	0.000124028	-0.0438824	Tumor down vs Normal	24.4123	0.017331	1.25035	0.00132898	1.49716	0.0170061	0.0120688	1
cg22236626	NENF	1.29E-07	0.213908	0.0554693	0.21095	0.213188	0.170683	0.172922	1.29E-07	-0.0402665	Tumor down vs Normal	74.3783	0.0145925	1.6754	0.000732839	2.2295	0.00699859	0.00333529	1
cg12180123	PAPOLG	1.27E-06	0.599751	0.00503506	0.150917	0.151881	0.123568	0.124532	1.27E-06	-0.0273492	Tumor down vs Normal	53.0894	0.00673182	0.286631	0.000136017	3.74237	0.00759261	0.00215563	1
cg19658829	UBC	9.00E-06	0.347019	0.0273072	0.146287	0.144589	0.119179	0.117481	9.00E-06	-0.0271076	Tumor down vs Normal	38.9182	0.00661342	0.93875	0.000421706	2.64354	0.00718753	0.00288883	1
cg17396989	WHSC2	3.64E-06	0.917369	0.0135207	0.168754	0.168569	0.141775	0.141591	3.64E-06	-0.0269786	Tumor down vs Normal	45.0687	0.00655058	0.0111089	4.97E-06	3.07908	0.00716054	0.00247089	1
cg04999036	TMEM87A	0.000147612	0.10112	0.00405147	0.134623	0.130888	0.113326	0.109592	0.000147612	-0.0212965	Tumor down vs Normal	23.6011	0.00408187	3.02633	0.00203994	3.8974	0.010785	0.00294019	1
cg04490516	MLST8	3.73E-05	0.99891	0.00582991	0.13802	0.138023	0.11912	0.119123	3.73E-05	-0.0189002	Tumor down vs Normal	30.4918	0.00321495	1.92E-06	7.39E-10	3.63976	0.00614023	0.00179243	1
cg20566420	PSMD9	9.93E-05	0.799562	9.24E-07	0.11613	0.116504	0.124011	0.124384	9.93E-05	0.00788092	Tumor up vs Normal	25.4714	0.00055898	0.0666549	2.04E-05	13.9332	0.00489232	0.000373072	1
cg21981379	WTAP	8.69E-05	0.539426	8.35E-06	0.100252	0.101074	0.108659	0.109481	8.69E-05	0.00840721	Tumor up vs Normal	26.1212	0.00063613	0.393282	9.87E-05	10.3057	0.00401561	0.000414002	1
cg12019576	KIAA0922	9.10E-05	0.320629	2.61E-05	0.097065	0.0984185	0.106215	0.107569	9.10E-05	0.00915025	Tumor up vs Normal	25.9002	0.000753543	1.05055	0.000267919	8.76565	0.00408045	0.000494599	1
cg23100493	HNRNPA1L2	7.36E-05	0.888382	0.000345874	0.165266	0.165046	0.177119	0.178424	7.36E-05	0.0133783	Tumor up vs Normal	27.9582	0.00152132	0.0203383	6.95E-06	6.23008	0.00542407	0.000870626	1
cg11340363	SLC5A5	0.000140365	0.801363	0.15168	0.122388	0.122116	0.138569	0.138297	0.000140365	0.0161811	Tumor up vs Normal	23.834	0.00235646	0.0654351	1.08E-05	1.67141	0.00264403	0.00168079	1
cg10937494	SLC16A3	0.00011511	0.418029	0.00524744	0.660091	0.656272	0.707912	0.704093	0.00011511	0.0478209	Tumor up vs Normal	24.7653	0.0205815	0.691088	0.00213268	3.71329	0.0493756	0.0141281	1
