# Supplementary material for: Association of DNA Promoter Methylation and BRAF Mutation in Thyroid Cancer
Source: Curr Oncol. 2023 Mar 2;30(3):2978–96. doi: 10.3390/curroncol30030227 (PMC10047424; doi:10.3390/curroncol30030227)
Supplement: Supplementary file 1 [file curroncol-30-00227-s001.zip › Table_S3_Enrichment Score_Common 51 DML.csv]

function	Enrichment Score	Enrichment p-value	% genes in group that are present	Tissue score	Tissue * BRAF_Pt score	Tumor vs. Normal score	Tumor * Mutant vs. Normal * Mutant score	Tumor * Wild vs. Normal * Wild score	# genes in list	in group	# genes not in list	in group	# genes in list	not in group	# genes not in list	not in group	GO ID
Focal adhesion	12.2618	4.73E-06	2.52525	11.4194	0.418357	11.4194	6.55281	7.37933	5	193	6	7367	kegg_pathway_269
Mismatch repair	7.73699	0.000436383	9.09091	6.47146	0.470063	6.47146	3.15194	4.51058	2	20	9	7540	kegg_pathway_132
Wnt signaling pathway	6.62638	0.00132495	1.88679	10.3175	0.209748	10.3175	5.61998	6.87425	3	156	8	7404	kegg_pathway_81
Proteoglycans in cancer	5.92457	0.00267297	1.47783	11.6726	0.230171	11.6726	6.07718	8.30175	3	200	8	7360	kegg_pathway_307
Viral myocarditis	5.83191	0.00293248	3.50877	11.0532	0.247332	11.0532	6.01802	7.44074	2	55	9	7505	kegg_pathway_238
Regulation of actin cytoskeleton	5.81445	0.00298411	1.4218	11.9666	0.494949	11.9666	7.28957	7.33796	3	208	8	7352	kegg_pathway_219
Pancreatic cancer	5.26716	0.00515826	2.63158	11.0532	0.247332	11.0532	6.01802	7.44074	2	74	9	7486	kegg_pathway_167
Colorectal cancer	5.02631	0.006563	2.32558	11.0532	0.247332	11.0532	6.01802	7.44074	2	84	9	7476	kegg_pathway_211
C-type lectin receptor signaling pathway	4.67708	0.00930612	1.94175	13.1709	0.787903	13.1709	7.64383	8.64331	2	101	9	7459	kegg_pathway_255
Human papillomavirus infection	4.64779	0.00958274	0.9375	10.5809	0.374679	10.5809	5.75381	7.0841	3	317	8	7243	kegg_pathway_143
Natural killer cell mediated cytotoxicity	4.48192	0.0113117	1.75439	12.5188	0.288656	12.5188	7.41593	8.00982	2	112	9	7448	kegg_pathway_39
Synthesis and degradation of ketone bodies	4.23755	0.014443	10	6.94032	0.0775268	6.94032	3.96928	4.15627	1	9	10	7551	kegg_pathway_220
Breast cancer	3.99762	0.0183592	1.36054	10.4872	0.197061	10.4872	5.32613	7.44739	2	145	9	7415	kegg_pathway_187
Gastric cancer	3.97209	0.018834	1.34228	10.4872	0.197061	10.4872	5.32613	7.44739	2	147	9	7413	kegg_pathway_197
Hippo signaling pathway	3.9221	0.0197994	1.30719	10.4872	0.197061	10.4872	5.32613	7.44739	2	151	9	7409	kegg_pathway_203
Cushing syndrome	3.89763	0.02029	1.29032	10.4872	0.197061	10.4872	5.32613	7.44739	2	153	9	7407	kegg_pathway_50
Cellular senescence	3.87349	0.0207857	1.27389	10.8722	0.341765	10.8722	5.81605	7.42071	2	155	9	7405	kegg_pathway_247
Protein processing in endoplasmic reticulum	3.803	0.0223037	1.22699	8.51762	0.385777	8.51762	4.93444	5.17268	2	161	9	7399	kegg_pathway_106
Hepatocellular carcinoma	3.75754	0.0233412	1.1976	10.4872	0.197061	10.4872	5.32613	7.44739	2	165	9	7395	kegg_pathway_320
Axon guidance	3.60716	0.0271288	1.10497	12.5188	0.288656	12.5188	7.41593	8.00982	2	179	9	7381	kegg_pathway_74
Chemokine signaling pathway	3.54651	0.028825	1.06952	12.5188	0.288656	12.5188	7.41593	8.00982	2	185	9	7375	kegg_pathway_147
Viral carcinogenesis	3.50724	0.0299795	1.04712	11.4879	0.580163	11.4879	6.16995	7.86307	2	189	9	7371	kegg_pathway_137
Human immunodeficiency virus 1 infection	3.41284	0.0329475	0.995025	12.5188	0.288656	12.5188	7.41593	8.00982	2	199	9	7361	kegg_pathway_249
Pathways in cancer	3.34457	0.0352754	0.575816	10.3175	0.209748	10.3175	5.61998	6.87425	3	518	8	7042	kegg_pathway_27
Human cytomegalovirus infection	3.28894	0.0372934	0.930233	11.0532	0.247332	11.0532	6.01802	7.44074	2	213	9	7347	kegg_pathway_263
cAMP signaling pathway	3.28043	0.0376121	0.925926	12.5188	0.288656	12.5188	7.41593	8.00982	2	214	9	7346	kegg_pathway_293
Human T-cell leukemia virus 1 infection	3.27196	0.0379319	0.921659	11.4879	0.580163	11.4879	6.16995	7.86307	2	215	9	7345	kegg_pathway_216
Butanoate metabolism	3.2555	0.0385616	3.7037	6.94032	0.0775268	6.94032	3.96928	4.15627	1	26	10	7534	kegg_pathway_169
Hippo signaling pathway - multiple species	3.21979	0.0399635	3.57143	15.229	0.329501	15.229	8.33033	10.8648	1	27	10	7533	kegg_pathway_61
Ras signaling pathway	3.17358	0.0418537	0.873362	12.5188	0.288656	12.5188	7.41593	8.00982	2	227	9	7333	kegg_pathway_193
Thyroid cancer	2.947	0.0524971	2.7027	11.6756	0.247093	11.6756	5.77626	8.5837	1	36	10	7524	kegg_pathway_277
Bladder cancer	2.84697	0.0580197	2.43902	11.6756	0.247093	11.6756	5.77626	8.5837	1	40	10	7520	kegg_pathway_171
MAPK signaling pathway	2.73039	0.0651936	0.682594	12.5188	0.288656	12.5188	7.41593	8.00982	2	291	9	7269	kegg_pathway_42
Valine, leucine and isoleucine degradation	2.69394	0.0676138	2.08333	6.94032	0.0775268	6.94032	3.96928	4.15627	1	47	10	7513	kegg_pathway_256
Hedgehog signaling pathway	2.67398	0.0689771	2.04082	11.6756	0.247093	11.6756	5.77626	8.5837	1	48	10	7512	kegg_pathway_192
Endometrial cancer	2.51126	0.0811657	1.72414	11.6756	0.247093	11.6756	5.77626	8.5837	1	57	10	7503	kegg_pathway_83
VEGF signaling pathway	2.51126	0.0811657	1.72414	9.8086	0.24781	9.8086	6.50153	5.15482	1	57	10	7503	kegg_pathway_214
PI3K-Akt signaling pathway	2.46447	0.0850536	0.58651	11.4044	0.46724	11.4044	6.19646	7.72054	2	339	9	7221	kegg_pathway_298
Basal cell carcinoma	2.43185	0.0878743	1.5873	8.11044	0.0969963	8.11044	4.42587	5.17477	1	62	10	7498	kegg_pathway_296
Non-small cell lung cancer	2.38729	0.091878	1.51515	11.6756	0.247093	11.6756	5.77626	8.5837	1	65	10	7495	kegg_pathway_121
Fc epsilon RI signaling pathway	2.38729	0.091878	1.51515	9.8086	0.24781	9.8086	6.50153	5.15482	1	65	10	7495	kegg_pathway_204
Acute myeloid leukemia	2.37291	0.0932091	1.49254	11.6756	0.247093	11.6756	5.77626	8.5837	1	66	10	7494	kegg_pathway_26
Renal cell carcinoma	2.35875	0.0945383	1.47059	15.229	0.329501	15.229	8.33033	10.8648	1	67	10	7493	kegg_pathway_299
Prolactin signaling pathway	2.33107	0.0971915	1.42857	11.6756	0.247093	11.6756	5.77626	8.5837	1	69	10	7491	kegg_pathway_333
Epithelial cell signaling in Helicobacter pylori infection	2.31754	0.0985154	1.40845	15.229	0.329501	15.229	8.33033	10.8648	1	70	10	7490	kegg_pathway_120
Adherens junction	2.31754	0.0985154	1.40845	9.8086	0.24781	9.8086	6.50153	5.15482	1	70	10	7490	kegg_pathway_188
p53 signaling pathway	2.30421	0.0998376	1.38889	11.6756	0.247093	11.6756	5.77626	8.5837	1	71	10	7489	kegg_pathway_12
Melanoma	2.30421	0.0998376	1.38889	11.6756	0.247093	11.6756	5.77626	8.5837	1	71	10	7489	kegg_pathway_154
Glioma	2.26535	0.103794	1.33333	11.6756	0.247093	11.6756	5.77626	8.5837	1	74	10	7486	kegg_pathway_309
Chronic myeloid leukemia	2.25276	0.105109	1.31579	11.6756	0.247093	11.6756	5.77626	8.5837	1	75	10	7485	kegg_pathway_124
Arrhythmogenic right ventricular cardiomyopathy (ARVC)	2.24034	0.106422	1.2987	10.8622	0.907536	10.8622	7.03685	5.99422	1	76	10	7484	kegg_pathway_335
B cell receptor signaling pathway	2.20408	0.110352	1.25	9.8086	0.24781	9.8086	6.50153	5.15482	1	79	10	7481	kegg_pathway_46
ErbB signaling pathway	2.1579	0.115567	1.19048	15.229	0.329501	15.229	8.33033	10.8648	1	83	10	7477	kegg_pathway_241
ECM-receptor interaction	2.114	0.120754	1.13636	10.8622	0.907536	10.8622	7.03685	5.99422	1	87	10	7473	kegg_pathway_71
Hypertrophic cardiomyopathy (HCM)	2.09283	0.123337	1.11111	10.8622	0.907536	10.8622	7.03685	5.99422	1	89	10	7471	kegg_pathway_306
Fc gamma R-mediated phagocytosis	2.08244	0.124626	1.0989	15.229	0.329501	15.229	8.33033	10.8648	1	90	10	7470	kegg_pathway_272
Small cell lung cancer	2.07216	0.125914	1.08696	11.6756	0.247093	11.6756	5.77626	8.5837	1	91	10	7469	kegg_pathway_90
Dilated cardiomyopathy (DCM)	2.04203	0.129765	1.05263	10.8622	0.907536	10.8622	7.03685	5.99422	1	94	10	7466	kegg_pathway_182
Endocrine resistance	2.03221	0.131046	1.04167	11.6756	0.247093	11.6756	5.77626	8.5837	1	95	10	7465	kegg_pathway_248
Choline metabolism in cancer	2.03221	0.131046	1.04167	9.8086	0.24781	9.8086	6.50153	5.15482	1	95	10	7465	kegg_pathway_233
Prostate cancer	2.0225	0.132324	1.03093	11.6756	0.247093	11.6756	5.77626	8.5837	1	96	10	7464	kegg_pathway_158
AGE-RAGE signaling pathway in diabetic complications	1.994	0.13615	1	11.6756	0.247093	11.6756	5.77626	8.5837	1	99	10	7461	kegg_pathway_244
Melanogenesis	1.9847	0.137422	0.990099	8.11044	0.0969963	8.11044	4.42587	5.17477	1	100	10	7460	kegg_pathway_113
T cell receptor signaling pathway	1.97549	0.138693	0.980392	15.229	0.329501	15.229	8.33033	10.8648	1	101	10	7459	kegg_pathway_294
Sphingolipid signaling pathway	1.84806	0.157543	0.854701	9.8086	0.24781	9.8086	6.50153	5.15482	1	116	10	7444	kegg_pathway_184
Thyroid hormone signaling pathway	1.83241	0.160027	0.840336	11.6756	0.247093	11.6756	5.77626	8.5837	1	118	10	7442	kegg_pathway_186
AMPK signaling pathway	1.83241	0.160027	0.840336	11.6756	0.247093	11.6756	5.77626	8.5837	1	118	10	7442	kegg_pathway_271
Yersinia infection	1.83241	0.160027	0.840336	9.8086	0.24781	9.8086	6.50153	5.15482	1	118	10	7442	kegg_pathway_94
Cell cycle	1.7945	0.16621	0.806452	11.6756	0.247093	11.6756	5.77626	8.5837	1	123	10	7437	kegg_pathway_4
FoxO signaling pathway	1.76535	0.171127	0.78125	11.6756	0.247093	11.6756	5.77626	8.5837	1	127	10	7433	kegg_pathway_32
Measles	1.75822	0.172352	0.775194	11.6756	0.247093	11.6756	5.77626	8.5837	1	128	10	7432	kegg_pathway_180
Apoptosis	1.71665	0.179667	0.740741	9.26562	0.531109	9.26562	5.89562	5.09471	1	134	10	7426	kegg_pathway_245
Apelin signaling pathway	1.71665	0.179667	0.740741	11.6756	0.247093	11.6756	5.77626	8.5837	1	134	10	7426	kegg_pathway_200
Fluid shear stress and atherosclerosis	1.69661	0.183303	0.724638	9.8086	0.24781	9.8086	6.50153	5.15482	1	137	10	7423	kegg_pathway_28
Signaling pathways regulating pluripotency of stem cells	1.69005	0.184511	0.719424	8.11044	0.0969963	8.11044	4.42587	5.17477	1	138	10	7422	kegg_pathway_130
Necroptosis	1.65795	0.19053	0.694444	9.26562	0.531109	9.26562	5.89562	5.09471	1	143	10	7417	kegg_pathway_324
Hepatitis C	1.65167	0.191729	0.689655	11.6756	0.247093	11.6756	5.77626	8.5837	1	144	10	7416	kegg_pathway_79
JAK-STAT signaling pathway	1.63927	0.194122	0.680272	11.6756	0.247093	11.6756	5.77626	8.5837	1	146	10	7414	kegg_pathway_105
mTOR signaling pathway	1.61501	0.198888	0.662252	8.11044	0.0969963	8.11044	4.42587	5.17477	1	150	10	7410	kegg_pathway_102
Oxytocin signaling pathway	1.60906	0.200076	0.657895	11.6756	0.247093	11.6756	5.77626	8.5837	1	151	10	7409	kegg_pathway_72
Hepatitis B	1.60315	0.201262	0.653595	11.1127	1.2463	11.1127	6.95734	6.42179	1	152	10	7408	kegg_pathway_253
Alzheimer disease	1.54083	0.214203	0.609756	9.26562	0.531109	9.26562	5.89562	5.09471	1	163	10	7397	kegg_pathway_16
Tight junction	1.51931	0.218862	0.595238	11.6756	0.247093	11.6756	5.77626	8.5837	1	167	10	7393	kegg_pathway_21
Kaposi sarcoma-associated herpesvirus infection	1.47796	0.228103	0.568182	11.6756	0.247093	11.6756	5.77626	8.5837	1	175	10	7385	kegg_pathway_300
Epstein-Barr virus infection	1.41044	0.244037	0.526316	11.6756	0.247093	11.6756	5.77626	8.5837	1	189	10	7371	kegg_pathway_329
Pathogenic Escherichia coli infection	1.36557	0.255235	0.5	15.229	0.329501	15.229	8.33033	10.8648	1	199	10	7361	kegg_pathway_139
Rap1 signaling pathway	1.3232	0.266282	0.47619	9.8086	0.24781	9.8086	6.50153	5.15482	1	209	10	7351	kegg_pathway_35
MicroRNAs in cancer	1.13201	0.322383	0.380228	11.6756	0.247093	11.6756	5.77626	8.5837	1	262	10	7298	kegg_pathway_268
Metabolic pathways	0.104762	0.900539	0.0698324	6.94032	0.0775268	6.94032	3.96928	4.15627	1	1431	10	6129	kegg_pathway_281
