# Supplementary material for: Association of DNA Promoter Methylation and BRAF Mutation in Thyroid Cancer
Source: Curr Oncol. 2023 Mar 2;30(3):2978–96. doi: 10.3390/curroncol30030227 (PMC10047424; doi:10.3390/curroncol30030227)
Supplement: Supplementary file 1 [file curroncol-30-00227-s001.zip › Table_S4_Enrichment Score_BRAF mut-specific 35 DML.csv]

function	Enrichment Score	Enrichment p-value	% genes in group that are present	Tissue score	Sex score	PersonID(Sex) score	Tumor vs. Normal score	# genes in list	in group	# genes not in list	in group	# genes in list	not in group	# genes not in list	not in group	GO ID
Human immunodeficiency virus 1 infection	3.24785	0.0388576	0.995025	4.88032	0.521592	1.27871	4.88032	2	199	10	7360	kegg_pathway_249
Autophagy - other	3.03494	0.0480775	3.22581	4.42789	0.000473639	2.23434	4.42789	1	30	11	7529	kegg_pathway_304
Allograft rejection	2.91647	0.0541242	2.85714	4.98368	0.518746	1.64027	4.98368	1	34	11	7525	kegg_pathway_319
Graft-versus-host disease	2.86235	0.0571343	2.7027	4.98368	0.518746	1.64027	4.98368	1	36	11	7523	kegg_pathway_58
Type I diabetes mellitus	2.76259	0.0631283	2.43902	4.98368	0.518746	1.64027	4.98368	1	40	11	7519	kegg_pathway_325
Autoimmune thyroid disease	2.73921	0.0646213	2.38095	4.98368	0.518746	1.64027	4.98368	1	41	11	7518	kegg_pathway_5
Amyotrophic lateral sclerosis (ALS)	2.55155	0.0779607	1.96078	4.57024	0.530128	0.194058	4.57024	1	50	11	7509	kegg_pathway_127
Notch signaling pathway	2.51453	0.0809012	1.88679	3.9837	0.31488	0.46935	3.9837	1	52	11	7507	kegg_pathway_29
Pyrimidine metabolism	2.46163	0.0852959	1.78571	5.11684	0.393722	0.725958	5.11684	1	55	11	7504	kegg_pathway_155
Viral myocarditis	2.44465	0.0867565	1.75439	4.98368	0.518746	1.64027	4.98368	1	56	11	7503	kegg_pathway_238
Antigen processing and presentation	2.26223	0.104118	1.44928	4.98368	0.518746	1.64027	4.98368	1	68	11	7491	kegg_pathway_170
Adipocytokine signaling pathway	2.26223	0.104118	1.44928	4.57024	0.530128	0.194058	4.57024	1	68	11	7491	kegg_pathway_101
Central carbon metabolism in cancer	2.26223	0.104118	1.44928	3.93889	0.378794	2.28005	3.93889	1	68	11	7491	kegg_pathway_292
Drug metabolism - other enzymes	2.20876	0.109837	1.36986	5.11684	0.393722	0.725958	5.11684	1	72	11	7487	kegg_pathway_68
Thyroid hormone synthesis	2.20876	0.109837	1.36986	3.85274	0.0961707	0.819072	3.85274	1	72	11	7487	kegg_pathway_336
PPAR signaling pathway	2.18316	0.112685	1.33333	5.04587	0.459647	1.56372	5.04587	1	74	11	7485	kegg_pathway_195
mRNA surveillance pathway	2.04336	0.129593	1.14943	5.89564	0.222029	2.298	5.89564	1	86	11	7473	kegg_pathway_122
Viral protein interaction with cytokine and cytokine receptor	1.95136	0.14208	1.04167	4.57024	0.530128	0.194058	4.57024	1	95	11	7464	kegg_pathway_174
TNF signaling pathway	1.81691	0.162527	0.900901	4.57024	0.530128	0.194058	4.57024	1	110	11	7449	kegg_pathway_52
Natural killer cell mediated cytotoxicity	1.79238	0.166563	0.877193	4.98368	0.518746	1.64027	4.98368	1	113	11	7446	kegg_pathway_39
Spliceosome	1.6655	0.189096	0.763359	4.13294	0.0514002	3.46108	4.13294	1	130	11	7429	kegg_pathway_259
Autophagy - animal	1.63827	0.194316	0.740741	4.42789	0.000473639	2.23434	4.42789	1	134	11	7425	kegg_pathway_264
Cell adhesion molecules (CAMs)	1.59905	0.202088	0.70922	4.98368	0.518746	1.64027	4.98368	1	140	11	7419	kegg_pathway_15
Phagosome	1.55557	0.211069	0.675676	4.98368	0.518746	1.64027	4.98368	1	147	11	7412	kegg_pathway_55
mTOR signaling pathway	1.53763	0.21489	0.662252	4.42789	0.000473639	2.23434	4.42789	1	150	11	7409	kegg_pathway_102
Cellular senescence	1.50292	0.22248	0.636943	4.98368	0.518746	1.64027	4.98368	1	156	11	7403	kegg_pathway_247
Kaposi sarcoma-associated herpesvirus infection	1.40212	0.246074	0.568182	4.98368	0.518746	1.64027	4.98368	1	175	11	7384	kegg_pathway_300
Epstein-Barr virus infection	1.33546	0.263037	0.526316	4.98368	0.518746	1.64027	4.98368	1	189	11	7370	kegg_pathway_329
Viral carcinogenesis	1.33092	0.264235	0.52356	4.98368	0.518746	1.64027	4.98368	1	190	11	7369	kegg_pathway_137
Human cytomegalovirus infection	1.22943	0.29246	0.465116	4.98368	0.518746	1.64027	4.98368	1	214	11	7345	kegg_pathway_263
Thermogenesis	1.22549	0.293614	0.462963	4.42789	0.000473639	2.23434	4.42789	1	215	11	7344	kegg_pathway_189
Human T-cell leukemia virus 1 infection	1.22157	0.294767	0.460829	4.98368	0.518746	1.64027	4.98368	1	216	11	7343	kegg_pathway_216
Endocytosis	1.12319	0.32524	0.409836	4.98368	0.518746	1.64027	4.98368	1	243	11	7316	kegg_pathway_161
Cytokine-cytokine receptor interaction	1.02517	0.358737	0.363636	4.57024	0.530128	0.194058	4.57024	1	274	11	7285	kegg_pathway_142
MAPK signaling pathway	0.974238	0.37748	0.341297	5.37664	0.188248	0.844962	5.37664	1	292	11	7267	kegg_pathway_42
Human papillomavirus infection	0.90472	0.404655	0.3125	4.98368	0.518746	1.64027	4.98368	1	319	11	7240	kegg_pathway_143
Neuroactive ligand-receptor interaction	0.86464	0.421203	0.296736	3.88781	0.303597	0.736085	3.88781	1	336	11	7223	kegg_pathway_136
PI3K-Akt signaling pathway	0.855586	0.425034	0.293255	4.42789	0.000473639	2.23434	4.42789	1	340	11	7219	kegg_pathway_298
Herpes simplex virus 1 infection	0.625008	0.535257	0.213675	4.98368	0.518746	1.64027	4.98368	1	467	11	7092	kegg_pathway_275
Metabolic pathways	0.0840568	0.919379	0.0698324	5.11684	0.393722	0.725958	5.11684	1	1431	11	6128	kegg_pathway_281
