# Supplementary material for: Association of DNA Promoter Methylation and BRAF Mutation in Thyroid Cancer
Source: Curr Oncol. 2023 Mar 2;30(3):2978–96. doi: 10.3390/curroncol30030227 (PMC10047424; doi:10.3390/curroncol30030227)
Supplement: Supplementary file 1 [file curroncol-30-00227-s001.zip › Table_S5_Enrichment Score_BRAF wild-specific 62 DML.csv]

function	Enrichment Score	Enrichment p-value	% genes in group that are present	Tissue score	Sex score	PersonID(Sex) score	Tumor vs. Normal score	# genes in list	in group	# genes not in list	in group	# genes in list	not in group	# genes not in list	not in group	GO ID
Yersinia infection	5.36265	0.00468846	2.52101	4.62541	0.1843	1.28431	4.62541	3	116	19	7433	kegg_pathway_94
Ras signaling pathway	3.59291	0.0275182	1.31004	4.07191	0.454098	0.972337	4.07191	3	226	19	7323	kegg_pathway_193
Endocytosis	3.42982	0.0323928	1.22951	4.65935	0.303368	1.41836	4.65935	3	241	19	7308	kegg_pathway_161
Glycosaminoglycan biosynthesis - keratan sulfate	3.21998	0.0399557	7.14286	4.15441	0.172966	0.442601	4.15441	1	13	21	7536	kegg_pathway_176
Carbon metabolism	3.13829	0.0433569	1.73913	3.97456	0.344966	0.879833	3.97456	2	113	20	7436	kegg_pathway_311
Steroid biosynthesis	2.9215	0.0538527	5.26316	3.83427	0.416658	0.134516	3.83427	1	18	21	7531	kegg_pathway_70
Hippo signaling pathway - multiple species	2.54613	0.0783847	3.57143	4.21045	0.506945	0.136952	4.21045	1	27	21	7522	kegg_pathway_61
Pentose phosphate pathway	2.51241	0.0810727	3.44828	3.91897	0.0666529	1.57666	3.91897	1	28	21	7521	kegg_pathway_63
Glyoxylate and dicarboxylate metabolism	2.47988	0.0837532	3.33333	4.03015	0.623279	0.183007	4.03015	1	29	21	7520	kegg_pathway_237
SNARE interactions in vesicular transport	2.38869	0.09175	3.0303	4.73761	0.348389	0.949098	4.73761	1	32	21	7517	kegg_pathway_198
Propanoate metabolism	2.36021	0.0944008	2.94118	4.03015	0.623279	0.183007	4.03015	1	33	21	7516	kegg_pathway_78
Fat digestion and absorption	2.18258	0.11275	2.43902	4.2904	0.308958	0.621558	4.2904	1	40	21	7509	kegg_pathway_163
Bladder cancer	2.18258	0.11275	2.43902	4.21045	0.506945	0.136952	4.21045	1	40	21	7509	kegg_pathway_171
Intestinal immune network for IgA production	2.09495	0.123076	2.22222	4.49074	0.0537792	2.06794	4.49074	1	44	21	7505	kegg_pathway_110
ABC transporters	2.09495	0.123076	2.22222	4.2904	0.308958	0.621558	4.2904	1	44	21	7505	kegg_pathway_179
Sphingolipid metabolism	2.07433	0.12564	2.17391	5.24576	0.162256	1.02664	5.24576	1	45	21	7504	kegg_pathway_115
Cholesterol metabolism	2.03451	0.130745	2.08333	4.2904	0.308958	0.621558	4.2904	1	47	21	7502	kegg_pathway_125
Valine, leucine and isoleucine degradation	2.03451	0.130745	2.08333	4.03015	0.623279	0.183007	4.03015	1	47	21	7502	kegg_pathway_256
Glutathione metabolism	1.94223	0.143384	1.88679	3.91897	0.0666529	1.57666	3.91897	1	52	21	7497	kegg_pathway_45
Cytosolic DNA-sensing pathway	1.9249	0.145891	1.85185	4.52398	0.0147393	1.64371	4.52398	1	53	21	7496	kegg_pathway_235
RIG-I-like receptor signaling pathway	1.85887	0.155848	1.72414	4.52398	0.0147393	1.64371	4.52398	1	57	21	7492	kegg_pathway_261
Non-small cell lung cancer	1.74051	0.175431	1.51515	4.21045	0.506945	0.136952	4.21045	1	65	21	7484	kegg_pathway_121
Central carbon metabolism in cancer	1.70012	0.182662	1.44928	4.89363	0.134798	0.922908	4.89363	1	68	21	7481	kegg_pathway_292
Pertussis	1.61294	0.1993	1.31579	4.52398	0.0147393	1.64371	4.52398	1	75	21	7474	kegg_pathway_183
Ribosome biogenesis in eukaryotes	1.61294	0.1993	1.31579	4.29657	0.449668	2.21121	4.29657	1	75	21	7474	kegg_pathway_223
Fc gamma R-mediated phagocytosis	1.45299	0.23387	1.0989	4.07649	0.072605	1.65206	4.07649	1	90	21	7459	kegg_pathway_272
Toll-like receptor signaling pathway	1.43393	0.238371	1.07527	4.52398	0.0147393	1.64371	4.52398	1	92	21	7457	kegg_pathway_109
Cholinergic synapse	1.27338	0.279884	0.892857	4.91816	0.318592	0.736906	4.91816	1	111	21	7438	kegg_pathway_226
Sphingolipid signaling pathway	1.23634	0.290444	0.854701	5.24576	0.162256	1.02664	5.24576	1	116	21	7433	kegg_pathway_184
Oocyte meiosis	1.19428	0.302921	0.813008	4.88175	0.442742	0.21574	4.88175	1	122	21	7427	kegg_pathway_157
Measles	1.15459	0.315188	0.775194	4.52398	0.0147393	1.64371	4.52398	1	128	21	7421	kegg_pathway_180
Autophagy - animal	1.11703	0.32725	0.740741	4.73761	0.348389	0.949098	4.73761	1	134	21	7415	kegg_pathway_264
Cell adhesion molecules (CAMs)	1.08144	0.339108	0.70922	4.49074	0.0537792	2.06794	4.49074	1	140	21	7409	kegg_pathway_15
Hepatitis C	1.05871	0.346902	0.689655	4.52398	0.0147393	1.64371	4.52398	1	144	21	7405	kegg_pathway_79
Phospholipase D signaling pathway	1.05315	0.348837	0.684932	4.07649	0.072605	1.65206	4.07649	1	145	21	7404	kegg_pathway_128
mTOR signaling pathway	1.02602	0.35843	0.662252	4.89363	0.134798	0.922908	4.89363	1	150	21	7399	kegg_pathway_102
Hepatitis B	1.01548	0.362229	0.653595	4.52398	0.0147393	1.64371	4.52398	1	152	21	7397	kegg_pathway_253
Hippo signaling pathway	1.01548	0.362229	0.653595	4.21045	0.506945	0.136952	4.21045	1	152	21	7397	kegg_pathway_203
Influenza A	0.994896	0.369762	0.636943	4.52398	0.0147393	1.64371	4.52398	1	156	21	7393	kegg_pathway_100
Protein processing in endoplasmic reticulum	0.965208	0.380904	0.613497	3.77283	0.606695	0.706092	3.77283	1	162	21	7387	kegg_pathway_106
NOD-like receptor signaling pathway	0.941493	0.390045	0.595238	4.52398	0.0147393	1.64371	4.52398	1	167	21	7382	kegg_pathway_20
Herpes simplex virus 1 infection	0.920334	0.398386	0.42735	4.569	0.247474	1.3189	4.569	2	466	20	7083	kegg_pathway_275
Kaposi sarcoma-associated herpesvirus infection	0.905343	0.404403	0.568182	4.52398	0.0147393	1.64371	4.52398	1	175	21	7374	kegg_pathway_300
Axon guidance	0.883795	0.413212	0.552486	3.98802	0.201872	4.02335	3.98802	1	180	21	7369	kegg_pathway_74
Epstein-Barr virus infection	0.846867	0.428756	0.526316	4.52398	0.0147393	1.64371	4.52398	1	189	21	7360	kegg_pathway_329
Viral carcinogenesis	0.842903	0.430459	0.52356	4.52398	0.0147393	1.64371	4.52398	1	190	21	7359	kegg_pathway_137
Pathogenic Escherichia coli infection	0.808408	0.445567	0.5	4.07649	0.072605	1.65206	4.07649	1	199	21	7350	kegg_pathway_139
Human immunodeficiency virus 1 infection	0.804702	0.447221	0.497512	4.52398	0.0147393	1.64371	4.52398	1	200	21	7349	kegg_pathway_249
Human cytomegalovirus infection	0.755238	0.469899	0.465116	4.52398	0.0147393	1.64371	4.52398	1	214	21	7335	kegg_pathway_263
MicroRNAs in cancer	0.614153	0.541099	0.380228	4.21045	0.506945	0.136952	4.21045	1	262	21	7287	kegg_pathway_268
MAPK signaling pathway	0.543246	0.58086	0.341297	5.19604	0.298192	0.401817	5.19604	1	292	21	7257	kegg_pathway_42
Human papillomavirus infection	0.488063	0.613814	0.3125	4.52398	0.0147393	1.64371	4.52398	1	319	21	7230	kegg_pathway_143
Metabolic pathways	0.476983	0.620653	0.27933	4.25729	0.317212	0.730205	4.25729	4	1428	18	6121	kegg_pathway_281
Pathways in cancer	0.23304	0.792122	0.191939	4.21045	0.506945	0.136952	4.21045	1	520	21	7029	kegg_pathway_27
