# Supplementary material for: Association of DNA Promoter Methylation and BRAF Mutation in Thyroid Cancer
Source: Curr Oncol. 2023 Mar 2;30(3):2978–96. doi: 10.3390/curroncol30030227 (PMC10047424; doi:10.3390/curroncol30030227)
Supplement: Supplementary file 1 [file curroncol-30-00227-s001.zip › Table_S6_DML in thyroid cancer earlier studies.xlsx]

## Sheet: Table S6
Methods	Results	Year
Methylation assay using MethyLight PCR; FFPE tissue from PTC and normal thyroid.	BRAF mutation 62%. Hyper methylation of PTGS2, HOXA1,TMEFF2, p16 and PTEN in tumor tissue.	Chang H et al, 2016[58]
Quantitative methylation specific PCR (QMSP); Fresh frozen tissue from PTC and heslthy thyroid tissue.	BRAF mutation 60%. With BRAF negative association with RASSF1A, and the positive association with RARβ2, TIMP3 and DCC. Hypermethylation in tumor KIF1A	Brait M et al, 2012[57]
Methylation assay using Real-time QMSP on fresh frozen tumor and healthy tissue.	Hypermethylation was found in the following percentages of thyroid cell cancers: RASSF1A (15%), TSHR (33%), RAR- 2 (22%), CDH1 (22%), and TIMP3 (22%). BRAF mutations were significantly associated with RAR- 2 as well as with an absence of RASSF1A methylation.	Hoque M et al, 2005[38]
Methylation-specific PCR assay using FFPE tumor and healthy tissue	The V600E mutation was found in 13 of 18 (66%) PTC; In PTC 12.5% had hypermethylation of RASSF1A.	Santoro A et al,2013[60]
Cell free DNA; methylation‐specific high‐resolution melting curve analysis	68.4% of tissue and 49.1% of cfDNA had the BRAF mutation; SLC5A8 and RASSF1A hypermethylated in PTC	Khatami F et al, 2020[59]
methylation‐specific high‐resolution melting curve analysis; Fresh frozen tissue from PTC.	promoter hyper methylation of SLC5A8.	Sheikholeslami. S, 2022[61]
