# Supplementary material for: Association of DNA Promoter Methylation and BRAF Mutation in Thyroid Cancer
Source: Curr Oncol. 2023 Mar 2;30(3):2978–96. doi: 10.3390/curroncol30030227 (PMC10047424; doi:10.3390/curroncol30030227)
Supplement: Supplementary file 1 [file curroncol-30-00227-s001.zip › Table_S7_Diffenrential methylation of previously reported genes_BRAF mutant.csv]

# of genes	GO ID	GO Description	p-value(Tissue)	p-value(Sex)	p-value(PersonID(Sex))	Mean(Normal)	LSMean(Normal)	Mean(Tumor)	LSMean(Tumor)	p-value(Tumor vs. Normal)	Difference(Tumor vs. Normal)	Difference(Tumor vs. Normal) (Description)	F(Tissue)	F(Sex)	F(Marker ID)	F(PersonID(Sex))	SS(Error)	F(Error)
35	RASSF1	RASSF1	6.03798e-28	0.8063	1.57282e-19	0.261344	0.260729	0.299927	0.299312	6.03798e-28	0.0385831	Tumor up vs Normal	126.325	0.0621508	338.61	8.38837	4.48048	1
29	CCND1	CCND1	1.21634e-17	0.671292	6.61495e-12	0.197745	0.196901	0.168978	0.168134	1.21634e-17	-0.028767	Tumor down vs Normal	75.9137	0.186884	125.819	5.68836	2.83664	1
22	HLA-E	HLA-E	1.61594e-11	0.118071	2.01005e-13	0.196045	0.192878	0.175192	0.171863	1.61594e-11	-0.0210151	Tumor down vs Normal	46.8199	2.72837	173.17	6.33205	1.40075	1
52	PTEN	PTEN	1.15889e-09	0.740078	2.9685e-182	0.105529	0.106019	0.109245	0.109707	1.15889e-09	0.00368816	Tumor up vs Normal	37.4322	0.113951	163.109	73.1363	0.304773	1
8	HOXA1	HOXA1	1.03943e-05	0.952142	4.35278e-06	0.12482	0.124939	0.143234	0.143353	1.03943e-05	0.0184144	Tumor up vs Normal	20.2165	0.00371672	12.7324	3.67733	0.316406	1
7	FZD7	FZD7	1.44955e-05	0.324807	0.312419	0.175127	0.173461	0.202479	0.200813	1.44955e-05	0.0273522	Tumor up vs Normal	19.6482	1.03199	222.089	1.14786	0.544537	1
7	TNFRSF1B	TNFRSF1B	0.000258033	0.404917	0.179372	0.167853	0.166065	0.140735	0.138947	0.000258033	-0.0271182	Tumor down vs Normal	13.7844	0.731839	127.162	1.33121	0.762954	1
7	ETV4	ETV4	0.00142277	0.754563	7.31727e-15	0.1344	0.134724	0.139117	0.139441	0.00142277	0.00471665	Tumor up vs Normal	10.431	0.101153	82.0907	7.91389	0.0305007	1
2	CDKN2A	CDKN2A	0.00386862	0.341207	0.218724	0.17985	0.177272	0.207695	0.205116	0.00386862	0.0278447	Tumor up vs Normal	9.14472	0.962311	66.395	1.32401	0.0793582	1
13	TGFB1	TGFB1	0.00604652	0.874532	1.29038e-24	0.125162	0.125368	0.120927	0.121133	0.00604652	-0.00423464	Tumor down vs Normal	7.61051	0.0257453	177.344	11.3272	0.120472	1
6	ETV5	ETV5	0.0781279	0.0502007	2.08596e-11	0.150349	0.153507	0.146143	0.1493	0.0781279	-0.00420666	Tumor down vs Normal	3.13685	4.48514	216.289	6.40391	0.0584891	1
9	EXO1	EXO1	0.0908403	0.880365	8.03987e-17	0.108321	0.10818	0.106156	0.106015	0.0908403	-0.00216525	Tumor down vs Normal	2.87809	0.0233878	315.793	8.44695	0.0391881	1
3	ETV6	ETV6	0.0951132	0.408472	0.00118144	0.0918198	0.0910501	0.0955143	0.0947446	0.0951132	0.00369446	Tumor up vs Normal	2.84724	0.720591	7.04636	2.78696	0.0112606	1
8	VEGFA	VEGFA	0.2029	0.593459	2.97907e-32	0.113214	0.113979	0.114961	0.115726	0.2029	0.0017472	Tumor up vs Normal	1.62952	0.296718	79.0695	17.1218	0.0353395	1
6	BRAF	BRAF	0.287521	0.423072	1.28071e-10	0.10797	0.107312	0.109374	0.108716	0.287521	0.00140407	Tumor up vs Normal	1.1375	0.675939	232.683	6.00544	0.0179689	1
9	DAPK	DAPK	0.425226	0.29045	0.0202648	0.16428	0.163122	0.166755	0.165597	0.425226	0.00247499	Tumor up vs Normal	0.637581	1.19531	224.678	1.89805	0.231127	1
3	ETV2	ETV2	0.480287	0.285116	0.000611202	0.144477	0.14305	0.146366	0.145193	0.480287	0.00214334	Tumor up vs Normal	0.502578	1.22337	559.383	2.96716	0.0209835	1
4	RAC3	RAC3	0.662436	0.0956604	0.0497053	0.340893	0.338015	0.338712	0.335834	0.662436	-0.00218093	Tumor down vs Normal	0.191511	3.13531	3429.43	1.72869	0.109082	1
5	ETV1	ETV1	0.746403	0.139439	3.46026e-18	0.137632	0.134006	0.136332	0.133079	0.746403	-0.000927196	Tumor down vs Normal	0.104949	2.41901	85.453	10.785	0.0571403	1
