# Supplementary material for: Association of DNA Promoter Methylation and BRAF Mutation in Thyroid Cancer
Source: Curr Oncol. 2023 Mar 2;30(3):2978–96. doi: 10.3390/curroncol30030227 (PMC10047424; doi:10.3390/curroncol30030227)
Supplement: Supplementary file 1 [file curroncol-30-00227-s001.zip › Table_S8_Diffenrential methylation of previously reported genes_BRAF wild.csv]

# of genes	GO ID	GO Description	p-value(Tissue)	p-value(Sex)	p-value(PersonID(Sex))	Mean(Normal)	Std(Normal)	Mean(Tumor)	Std(Tumor)	p-value(Tumor vs. Normal)	Difference(Tumor vs. Normal)	Difference(Tumor vs. Normal) (Description)	F(Tissue)	F(Sex)	F(Marker ID)	F(PersonID(Sex))	SS(Error)	F(Error)
35	RASSF1	RASSF1	1.20703e-52	0.417098	5.23627e-52	0.248235	0.167562	0.307889	0.226371	1.20703e-52	0.0595751	Tumor up vs Normal	252.617	0.686617	278.005	16.5734	8.01092	1
29	CCND1	CCND1	3.58405e-38	0.48193	3.1883e-21	0.197319	0.129865	0.158047	0.0834639	3.58405e-38	-0.0391667	Tumor down vs Normal	178.88	0.513468	148.9	7.71226	3.32946	1
8	HOXA1	HOXA1	9.09463e-10	0.675216	1.6079e-06	0.118135	0.0251672	0.148008	0.0692823	9.09463e-10	0.0298737	Tumor up vs Normal	39.847	0.180813	12.992	3.4439	0.634629	1
52	PTEN	PTEN	8.28038e-08	0.393593	1.81555e-52	0.102865	0.028583	0.105913	0.0334343	8.28038e-08	0.00303824	Tumor up vs Normal	28.9334	0.760263	187.695	16.1771	0.403303	1
7	FZD7	FZD7	3.48599e-07	0.226569	0.0516981	0.170279	0.0989109	0.200951	0.143307	3.48599e-07	0.0306717	Tumor up vs Normal	27.2566	1.55664	238.671	1.60086	0.741479	1
22	HLA-E	HLA-E	2.6885e-06	0.366909	2.59633e-33	0.186917	0.10839	0.206277	0.142422	2.6885e-06	0.0193597	Tumor up vs Normal	22.3038	0.852293	125.694	11.5567	3.75757	1
6	BRAF	BRAF	7.29297e-05	0.23647	5.20297e-06	0.103631	0.0232808	0.109957	0.0285229	7.29297e-05	0.00632557	Tumor up vs Normal	16.305	1.48963	157.756	3.33244	0.0382237	1
6	ETV5	ETV5	0.000368369	0.504913	2.81794e-12	0.139264	0.0394064	0.149765	0.0556638	0.000368369	0.010501	Tumor up vs Normal	13.0616	0.461057	147.705	5.81713	0.131499	1
8	VEGFA	VEGFA	0.0197035	0.896185	2.20702e-06	0.108623	0.0192919	0.111691	0.0234244	0.0197035	0.0032124	Tumor up vs Normal	5.4929	0.0174644	83.7553	3.39331	0.0529051	1
13	TGFB1	TGFB1	0.0462913	0.345252	1.33719e-21	0.121254	0.0365122	0.118815	0.0372038	0.0462913	-0.00243921	Tumor down vs Normal	3.98941	0.934459	243.227	8.38251	0.114525	1
7	TNFRSF1B	TNFRSF1B	0.0716161	0.947977	0.00168624	0.163411	0.137042	0.176773	0.151038	0.0716161	0.0133619	Tumor up vs Normal	3.27042	0.0043655	198.2	2.28327	1.17281	1
2	CDKN2A	CDKN2A	0.0824497	0.0430519	0.86819	0.180654	0.0495838	0.19818	0.0664136	0.0824497	0.0175255	Tumor up vs Normal	3.11283	4.66747	56.3297	0.638248	0.138927	1
3	ETV6	ETV6	0.143037	0.837027	0.0261251	0.0908971	0.0117511	0.0938702	0.014381	0.143037	0.00306188	Tumor up vs Normal	2.17716	0.0434142	7.78635	1.82994	0.0149233	1
9	DAPK	DAPK	0.214634	0.98183	0.00207794	0.161348	0.0809987	0.165984	0.0781866	0.214634	0.00480576	Tumor up vs Normal	1.54528	0.000531847	159.839	2.22173	0.537113	1
4	RAC3	RAC3	0.3884	0.0364298	0.0172435	0.33537	0.243069	0.331285	0.260338	0.3884	-0.00408497	Tumor down vs Normal	0.748287	5.02828	3683.64	1.88426	0.147181	1
3	ETV2	ETV2	0.414291	0.0746833	0.00798503	0.14109	0.0527237	0.144316	0.0567692	0.414291	0.00246373	Tumor up vs Normal	0.671721	3.53177	580.096	2.10739	0.0313168	1
5	ETV1	ETV1	0.757834	0.539979	2.18079e-19	0.139168	0.0354424	0.138274	0.0438253	0.757834	-0.000894269	Tumor down vs Normal	0.0953353	0.388798	91.631	9.3686	0.0890436	1
9	EXO1	EXO1	0.830086	0.365191	0.0010535	0.105573	0.0348067	0.105186	0.0341174	0.830086	-0.000275757	Tumor down vs Normal	0.0461157	0.858436	306.989	2.34272	0.0592586	1
7	ETV4	ETV4	0.967969	0.711444	6.74692e-06	0.134296	0.0200658	0.134241	0.0219612	0.967969	-5.5011e-05	Tumor down vs Normal	0.00161534	0.140793	99.0454	3.24287	0.0402466	1
