# Supplementary material for: Association of DNA Promoter Methylation and BRAF Mutation in Thyroid Cancer
Source: Curr Oncol. 2023 Mar 2;30(3):2978–96. doi: 10.3390/curroncol30030227 (PMC10047424; doi:10.3390/curroncol30030227)
Supplement: Supplementary file 1 [file curroncol-30-00227-s001.zip › Table_S11_List_T-cell inflamed Genes.csv]

Gene	Category
TIGIT	Inflamed T-cell
CD27	Inflamed T-cell
CD8A	Inflamed T-cell
PDCD1LG2	Inflamed T-cell
LAG3	Inflamed T-cell
CD274	Inflamed T-cell
CXCR6	Inflamed T-cell
CMKLR1	Inflamed T-cell
NKG7	Inflamed T-cell
CCL5	Inflamed T-cell
PSMB10	Inflamed T-cell
IDO1	Inflamed T-cell
CXCL9	Inflamed T-cell
HLA-DQA1	Inflamed T-cell
CD276	Inflamed T-cell
STAT1	Inflamed T-cell
HLA.DRB1	Inflamed T-cell
HLA-E	Inflamed T-cell
